# Supplementary material for: Long-term changes of nitrogen leaching and the contributions of terrestrial nutrient sources to lake eutrophication dynamics on the Yangtze Plain of China
Source: Copernicus journal article supplement (doi:10.5194/bg-20-1635-2023), 2023-04-26
Supplement: Supplementary file 1 [file bg-20-1635-2023-supplement.pdf]

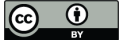

*Supplement of*

## **Long-term changes of nitrogen leaching and the contributions of terrestrial nutrient sources to lake eutrophication dynamics on the Yangtze Plain of China**

**Qi Guan et al.**

*Correspondence to:* Jing Tang ([jing.tang@nateko.lu.se](mailto:jing.tang@nateko.lu.se))

The copyright of individual parts of the supplement might differ from the article licence.

## Section S1 Regrouping land cover fractions

Annual land cover fractions of urban, cropland, pasture and natural area were derived from the 37 land cover types in the Climate Change Initiative Land Cover (CCI-LC version 2.0) dataset (Defourny et al., 2012) with a spatial resolution of 300m. For a given 0.1° grid cell, we determined all original land cover class pixels within this grid cell, which were then grouped into urban, cropland, pasture and natural area according to the guideline of CCI-LC dataset (Kirches et al., 2014). The cover fractions of each land use type were calculated as the number of pixels in the land use type divided by the total number of pixels within one 0.1 grid cell, which were used as input datasets for LPJ-GUESS.

## Section S2 Interpolation of crop distribution maps

The crop cultivation maps in Yangtze Plain were interpolated from station-based observations by using an adaptive inverse distance weighting method (AIDW) (Lu and Wong, 2008). In this study, we assumed that the two nearest fields stations for a given grid cell provide critical information about crop types and corresponding planting fractions for gridded crop cultivation maps. The crop planting fractions were related to inverse-distance weights modified by optimal decay parameters, which were derived adaptively based on spatial distributions of field stations across Yangtze Plain. For a given point, the spatial pattern coefficient ( $R$ ), representing spatial distributions, was determined as the ratio between the actual ( $r_{obs}$ ) and expected ( $r_{exp}$ ) nearest neighbor distance. The numbers of field stations ( $n$ ) and the total area of Yangtze Plain ( $A$ ) were used to calculate the expected nearest neighbor distance ( $r_{exp}$ ) according to the following formula (Lu and Wong, 2008).

$$r_{exp} = 1/(2(n/A)^{0.5}) \quad (S.1)$$

Similarly, the nearest neighbor distance ( $r_{obs}$ ) was also calculated based on the two nearest field stations. To assign the optimal decay parameters, the spatial pattern ( $R$ ) was required to be normalized by using min-max normalization.

$$\mu_R = \begin{cases} 0, & R(S_0) < R_{\min} \\ 0.5 + 0.5 \sin(\pi/R_{\max})(R(S_0) - R_{\min}), & R_{\min} \leq R(S_0) \leq R_{\max} \\ 1, & R(S_0) > R_{\max} \end{cases} \quad (S.2)$$

The optimal decay parameters ( $\alpha$ ) were then converted from normalized spatial pattern ( $\mu_R$ ) based on Fig. 3 in (Lu and Wong, 2008). Finally, the exponential function with the optimal decay parameters was used to derive inverse-distance weights as crop planting fractions, thus producing gridded crop types and planting fraction maps for Yangtze Plain (Fig. S3).

### Section S3 Recalibrating the parameters of rice-related CFTs

Based on the observed of crop yield, we recalibrated the relationship between the leaf-based nitrogen content and the maximum catalytic capacity of rubisco, and this relationship can be expressed as.

$$N = pV_m^{25} + N_0 \quad (1)$$

where  $N$  represents the foliage nitrogen content;  $V_m^{25}$  is the maximum catalytic capacity of rubisco at 25°C;  $p$  and  $N_0$  are the empirical coefficients. Moreover, the larger leaf area characterizes the hybrid and super-hybrid rice (Huang et al., 2020). In such case, we set the different combinations of parameter  $p$  (i.e., 1-25) and specific leaf area (SLA: 40-70) and then simulated the crop yield for the rotation of early- and late-season rice and single-season rice. The simulated crop yield was compared with the observed values, from which the pairs of parameter  $p$  and SLA corresponding to the lowest relative mean error was obtained as the optimal parameters used in the simulations of the whole Yangtze Plain.

**Table S1.** Basic information (names and crop rotations) and relevant parameters (CFTs, hydrology, specific leaf area (SLA, unit: m<sup>2</sup>/kg C), empirical parameter expressing relationship between leaf N and maximum Rubisco capacity, *p* and harvest efficiency) of eleven studied crop types in agricultural ecosystems of Yangtze Plain, where three types of hydrological managements were used here, including irrigation till saturation (irrigated\_sat), inundation (inundated) and rain-fed (rainfed).

| CFTs    | Crop names                 | Rotations | Hydrology     | SLA    | <i>p</i> | Harvest efficiency |
|---------|----------------------------|-----------|---------------|--------|----------|--------------------|
| TeCoWWi | summer maize, winter wheat | Yes       | irrigated_sat | 45, 35 | 25, 25   | 0.9, 0.9           |
| TeSoWWi | soybean, winter wheat      | Yes       | irrigated_sat | 30, 35 | 25, 25   | 0.9, 0.9           |
| TrELRi  | early-, late-season rice   | Yes       | inundated     | 55, 70 | 4, 3     | 1.0, 1.0           |
| TrSRi   | single-season rice         | No        | inundated     | 45     | 4        | 1.0                |
| TrPe    | peanut                     | No        | irrigated_sat | 45     | 25       | 0.9                |
| TeSWi   | spring wheat               | No        | irrigated_sat | 35     | 25       | 0.9                |
| TeSc    | sugar cane                 | No        | rainfed       | 45     | 25       | 0.9                |
| TeWWi   | winter wheat               | No        | irrigated_sat | 35     | 25       | 0.9                |
| TeRa    | rapeseed                   | No        | irrigated_sat | 30     | 25       | 0.9                |
| TeCoSp  | spring maize               | No        | irrigated_sat | 45     | 25       | 0.9                |
| TeSo    | soybean                    | No        | irrigated_sat | 30     | 25       | 0.9                |

**Table S2.** Basic information (ID, names, locations, lake areas and catchment areas) and the mean PEO derived from satellite observation in fifty large lakes of Yangtze Plain.

| ID  | Name        | Lon    | Lat   | Lake area (km <sup>2</sup> ) | Catchment area (km <sup>2</sup> ) | PEO (%) |
|-----|-------------|--------|-------|------------------------------|-----------------------------------|---------|
| L01 | Beimin      | 111.87 | 29.71 | 14.25                        | 919.08                            | 88.52   |
| L02 | Xihu        | 111.94 | 29.36 | 40.00                        | 2711.25                           | 91.07   |
| L03 | Shanpo      | 112.03 | 29.43 | 18.83                        | 2017.21                           | 89.12   |
| L04 | Changhu     | 112.4  | 30.44 | 114.03                       | 5771.52                           | 87.01   |
| L05 | Datong      | 112.51 | 29.21 | 83.10                        | 3638.43                           | 75.43   |
| L06 | Donghu (CD) | 112.64 | 29.37 | 24.85                        | 232.47                            | 89.48   |
| L07 | Dongting    | 113.12 | 29.34 | 2614.36                      | 270662.3                          | 69.73   |
| L08 | Honghu      | 113.34 | 29.86 | 340.05                       | 4200.21                           | 89.84   |
| L09 | Longsai     | 113.51 | 30.84 | 9.34                         | 1443.24                           | 87.64   |
| L10 | Huanggai    | 113.55 | 29.7  | 59.47                        | 2510.91                           | 94.81   |
| L11 | Wuhu (XT)   | 113.8  | 30.18 | 32.93                        | 440.37                            | 86.50   |
| L12 | Yezhu       | 114.07 | 30.86 | 25.88                        | 1747.26                           | 92.03   |
| L13 | Xiliang     | 114.08 | 29.95 | 28.58                        | 918.27                            | 90.53   |
| L14 | Luhu        | 114.2  | 30.22 | 47.33                        | 790.83                            | 83.38   |
| L15 | Futou       | 114.23 | 30.02 | 141.22                       | 1494.63                           | 87.58   |
| L16 | Houhu       | 114.28 | 30.74 | 12.61                        | 876.63                            | 85.61   |
| L17 | Tangxun     | 114.36 | 30.42 | 44.83                        | 578.97                            | 90.25   |
| L18 | Donghu (WH) | 114.4  | 30.56 | 34.35                        | 208.17                            | 89.94   |
| L19 | Wuhu (WH)   | 114.49 | 30.81 | 27.5                         | 3051.45                           | 89.20   |
| L20 | Liangzi     | 114.51 | 30.23 | 351.77                       | 3152.7                            | 79.88   |
| L21 | Baoxie      | 114.58 | 30.38 | 17.75                        | 2407.77                           | 94.65   |
| L22 | Zhangdu     | 114.7  | 30.65 | 36.24                        | 2413.44                           | 91.88   |
| L23 | Baoan       | 114.71 | 30.25 | 38.71                        | 512.01                            | 84.87   |
| L24 | Wusi        | 114.71 | 30.45 | 12.00                        | 599.04                            | 91.71   |
| L25 | Yaer        | 114.72 | 30.46 | 12.64                        | 3152.7                            | 86.94   |
| L26 | Sanshan     | 114.77 | 30.31 | 17.83                        | 662.4                             | 89.96   |
| L27 | Daye        | 115.1  | 30.1  | 73.65                        | 1247.31                           | 89.09   |
| L28 | Wanghu      | 115.33 | 29.87 | 42.87                        | 1258.11                           | 81.86   |
| L29 | Wushan      | 115.59 | 29.91 | 15.11                        | 1520.19                           | 95.98   |
| L30 | Chihu       | 115.69 | 29.78 | 35.9                         | 2069.23                           | 91.44   |
| L31 | Taibai      | 115.81 | 29.97 | 27.42                        | 1460.19                           | 93.47   |
| L32 | Saihu       | 115.85 | 29.69 | 53.33                        | 2523.69                           | 87.68   |
| L33 | Xiayao      | 116.06 | 28.69 | 16.1                         | 190.8                             | 94.85   |
| L34 | Longgan     | 116.15 | 29.95 | 280.48                       | 3233.07                           | 83.85   |
| L35 | Poyang      | 116.67 | 29.14 | 3206.98                      | 170502                            | 78.12   |

|     |           |        |       |         |          |       |
|-----|-----------|--------|-------|---------|----------|-------|
| L36 | Wuchang   | 116.69 | 30.28 | 112.02  | 874.53   | 91.45 |
| L37 | Caizi     | 117.07 | 30.8  | 171.59  | 4015.98  | 90.26 |
| L38 | Shengjin  | 117.07 | 30.38 | 96.09   | 1639.98  | 92.76 |
| L39 | Baidang   | 117.38 | 30.81 | 38.69   | 1099.35  | 85.54 |
| L40 | Chaohu    | 117.53 | 31.57 | 786.01  | 12951.81 | 83.06 |
| L41 | Shijiu    | 118.88 | 31.47 | 178.04  | 1089     | 91.04 |
| L42 | Gucheng   | 118.92 | 31.28 | 27.9    | 1383.39  | 86.15 |
| L43 | Nanyi     | 118.96 | 31.11 | 197.83  | 4004.82  | 89.33 |
| L44 | Changdang | 119.55 | 31.62 | 84.33   | 678.06   | 94.83 |
| L45 | Xijiu     | 119.8  | 31.37 | 11.18   | 567.45   | 93.36 |
| L46 | Gehu      | 119.81 | 31.6  | 139.56  | 1729.89  | 95.87 |
| L47 | Taihu     | 120.19 | 31.2  | 2537.17 | 18769.77 | 73.37 |
| L48 | Yangcheng | 120.77 | 31.43 | 123.6   | 1556.1   | 83.95 |
| L49 | Chenghu   | 120.82 | 31.21 | 37.11   | 215.01   | 83.32 |
| L50 | Dianshan  | 120.96 | 31.12 | 63.71   | 2634.12  | 79.23 |

**Table S3.** N-P ratios of animal manure contained in global N manure products (Parham et al., 2003; Sheppard, 2019; Azeez and Van Averbek, 2010).

|           | Cattle | Pig   | Goat and sheep | Chicken and duck |
|-----------|--------|-------|----------------|------------------|
| N-P ratio | 3.3:1  | 4.3:1 | 5.19:1         | 2.53:1           |

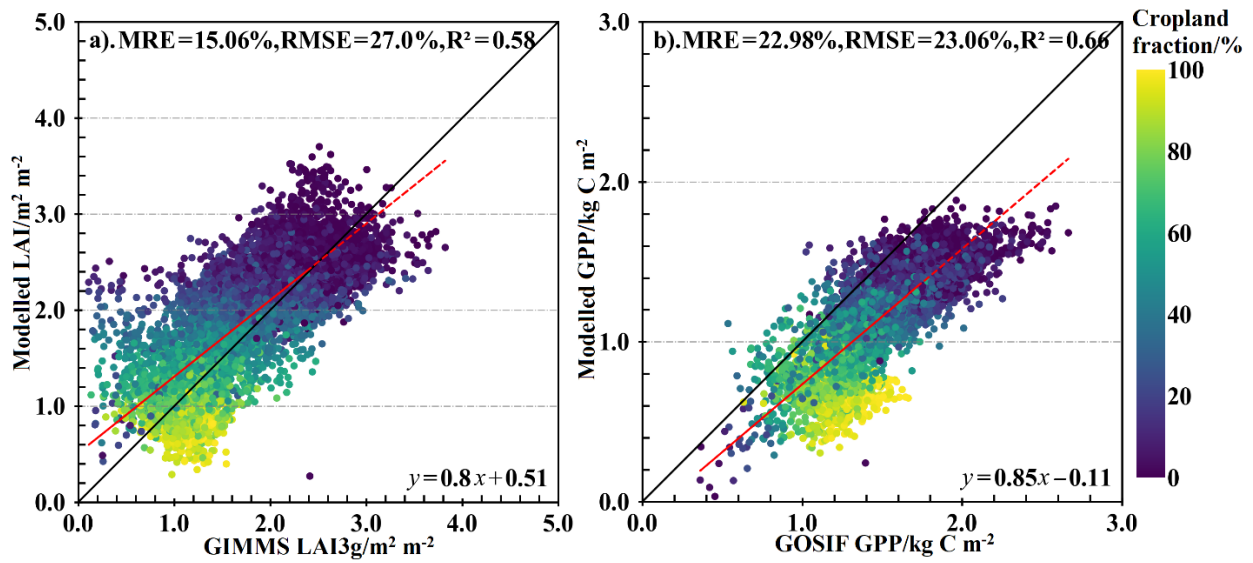

**Figure S1.** Comparison of the simulated LAI with GIMMS LAI3g from 1982 to 2011 (a) and modeled GPP against GOSIF GPP from 1992 to 2018 (b), respectively. The red dashed lines are the fitting lines for the modeled with satellite-derived values.

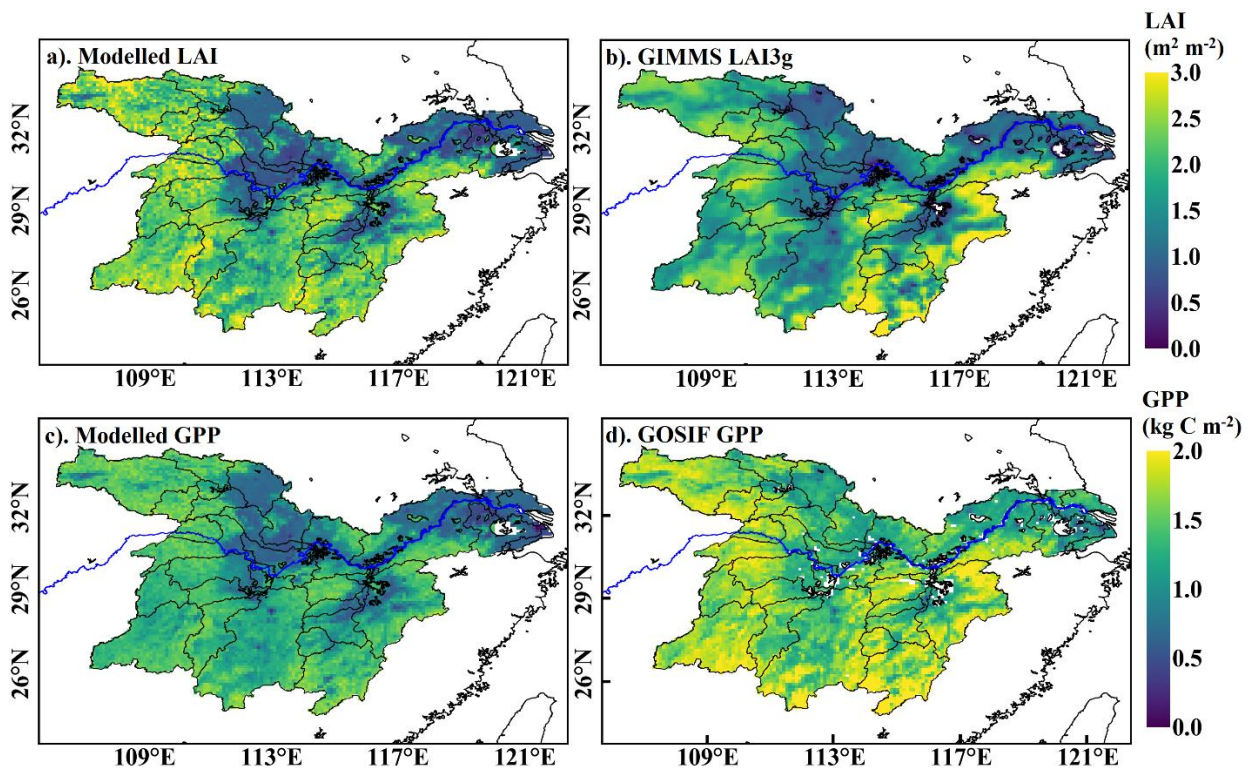

**Figure S2.** Comparison of spatial distributions for annual mean simulated LAI (a) v.s. LAI3g (b) for 1982-2011, and of simulated GPP (c) vs. GOSIF GPP (d) for 1992-2018.

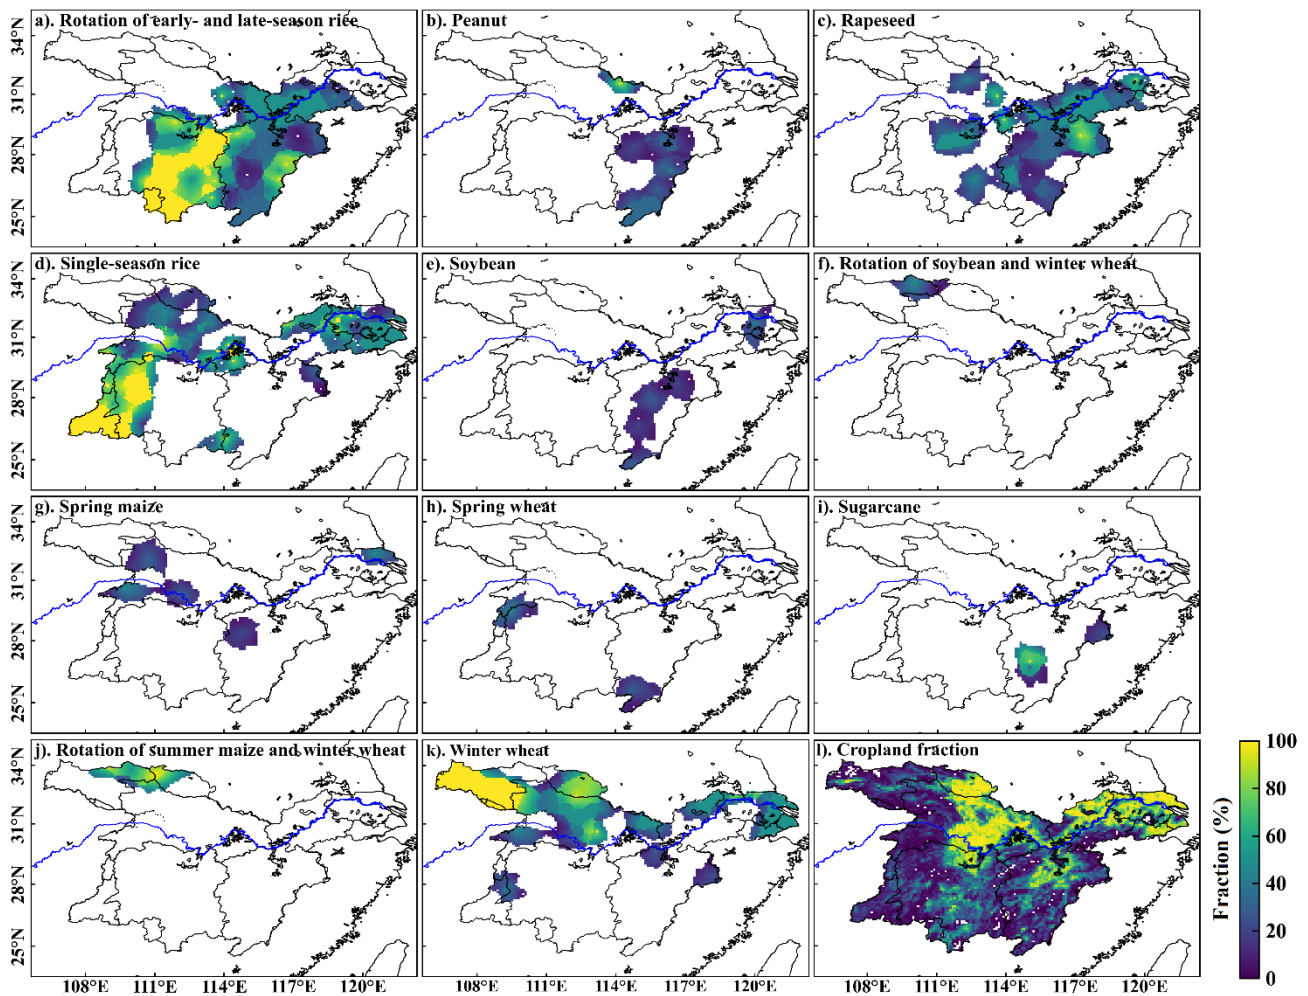

**Figure S3.** Spatial distributions of all studied cropland fraction for the crop types and crop rotations applied in the LPJ-GUESS simulation in Yangtze Plain. **a-k** represent the cropland fraction of each crop type against the cropland area. **i** shows the fraction of cropland over total land area.

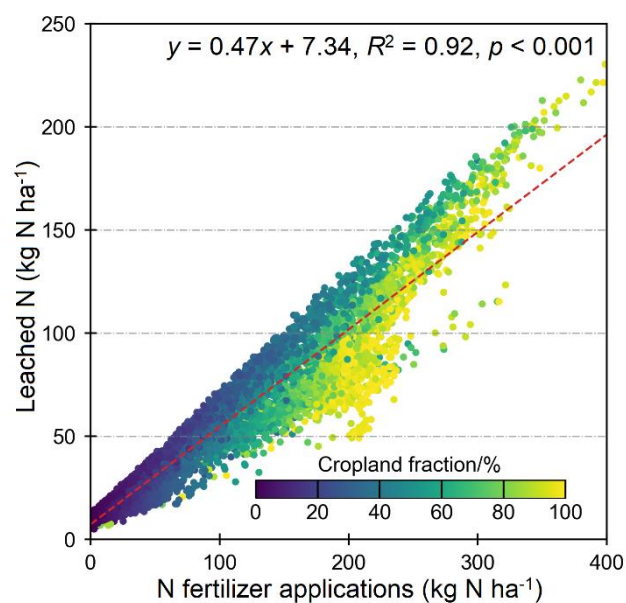

**Figure S4.** Response of leached nitrogen to different levels of fertilizer applications from 1979 to 2018 over the



entire Yangtze Plain.

## References

- Azeez, J. O. and Van Averbek, W.: Nitrogen mineralization potential of three animal manures applied on a sandy clay loam soil, *Bioresour Technol*, 101, 5645-5651, 10.1016/j.biortech.2010.01.119, 2010.
- Defourny, P., Kirches, G., Brockmann, C., Boettcher, M., Peters, M., Bontemps, S., Lamarche, C., Schlerf, M., and Santoro, M. J. P. U. G. V.: Land cover CCI, 2, 2012.
- Huang, M., Lei, T., Cao, F., Chen, J., Shan, S., and Zou, Y.: Grain yield responses to nitrogen rate in two elite double-cropped inbred rice cultivars released 41 years apart, *Field Crops Research*, 259, 107970, 2020.
- Kirches, G., Brockmann, C., Boettcher, M., Peters, M., Bontemps, S., Lamarche, C., Schlerf, M., Santoro, M., and Defourny, P.: Land cover cci-product user guide-version 2, ESA Public Document CCI-LC-PUG, 2014.
- Lu, G. Y. and Wong, D. W.: An adaptive inverse-distance weighting spatial interpolation technique, *Computers & Geosciences*, 34, 1044-1055, 10.1016/j.cageo.2007.07.010, 2008.
- Parham, J. A., Deng, S. P., Da, H. N., Sun, H. Y., and Raun, W. R.: Long-term cattle manure application in soil. II. Effect on soil microbial populations and community structure, *Biology and Fertility of Soils*, 38, 209-215, 10.1007/s00374-003-0657-7, 2003.
- Sheppard, S. C.: Elemental Composition of Swine Manure from 1997 to 2017: Changes Relevant to Environmental Consequences, *J Environ Qual*, 48, 164-170, 10.2134/jeq2018.06.0226, 2019.
